# Supplementary material for: Occupational safety of janitors in Ethiopian University during COVID-19 pandemic: Results from observational study
Source: PubMed Central journal article supplement (PMC9374277; doi:10.3389/fpubh.2022.895977), 2022-07-29
Supplement: Appendix_1.pdf [file Appendix_1.pdf]

# **Occupational safety of janitors in Ethiopian University during COVID-19 pandemic: results from observational study**

Chala Daba<sup>1\*\*</sup>, Mesfin Gebrehiwot<sup>1\*\*</sup>, Lechisa Asefa<sup>2</sup>, Hailu Lemma<sup>2</sup>, Amanuel Atamo<sup>1</sup>, Edosa Kebede<sup>3</sup>,  
Asha Embrandiri<sup>1</sup>, and Sisay Abebe Debela<sup>4</sup>

\*Correspondence: [chaladaba293@gmail.com](mailto:chaladaba293@gmail.com), [gebrehiwotmesfin@yahoo.com](mailto:gebrehiwotmesfin@yahoo.com)

<sup>1</sup>Department of Environmental Health, College of Medicine and Health Sciences, Wollo University,  
Dessie, Ethiopia, P.O.B.1145

<sup>2</sup>Department of Environmental Health Science, Institute of Health, Bule Hora University, Bule Hora,  
Ethiopia, P.O.B. 144

<sup>3</sup>Departement of Medical Laboratory Science, College of Medicine and Health Sciences, Ambo  
University, Ambo, Ethiopia

<sup>4</sup>Department of Public Health, College of Medicine and Health Sciences, Salale University, Fitcha,  
Ethiopia

*†These authors have contributed equally to this work*

**Appendix 1** Observational checklist used to collect data about the working practice of Bule Hora University janitors to prevent COVID-19 transmission, from November to December, 2021

Checklist ID \_\_\_\_\_

Name of the data collector \_\_\_\_\_ Signature \_\_\_\_\_ Date \_\_\_/\_\_\_/2021

Name of the supervisor \_\_\_\_\_ Signature \_\_\_\_\_ Date \_\_\_/\_\_\_/2021

| S/no | Question                                                           | Response        | Remark |
|------|--------------------------------------------------------------------|-----------------|--------|
| 1.   | Wear glove while cleaning                                          | 0=No<br>1= Yes  |        |
| 2.   | Wear facemask while cleaning                                       | 0=No<br>1= Yes  |        |
| 3.   | Wash hands before wearing PPE                                      | 0=No<br>1= Yes  |        |
| 4.   | Wash hands after removing PPE                                      | 0=No<br>1= Yes  |        |
| 5.   | Remove and discharge PPE after finishing surface cleaning          | 0=No<br>1= Yes  |        |
| 6.   | Change gloves after cleaning                                       | 0= No<br>1= Yes |        |
| 7.   | Follow disinfection procedure                                      | 0=No<br>1= Yes  |        |
| 8.   | Handle waste material properly including face mask, glove and etc. | 0= No<br>1= Yes |        |
| 9.   | Wash hands after sneezing and coughing                             | 0=No<br>1= Yes  |        |
| 10   | Avoid touching noses, faces and eyes                               | 0= No           |        |

|    |                                       |                 |  |
|----|---------------------------------------|-----------------|--|
|    | before hand washing                   | 1= Yes          |  |
| 11 | Maintain social distancing            | 0=No<br>1= Yes  |  |
| 12 | Wear protective shoes during cleaning | 0= No<br>1= Yes |  |
| 13 | Wear gown during cleaning             | 0=No<br>1=Yes   |  |

\*PPE- Personal protective equipment
