# Supplementary material for: Occupational safety of janitors in Ethiopian University during COVID-19 pandemic: Results from observational study
Source: PubMed Central journal article supplement (PMC9374277; doi:10.3389/fpubh.2022.895977), 2022-07-29
Supplement: Appendix_2.pdf [file Appendix_2.pdf]

# **Occupational safety of janitors in Ethiopian University during COVID-19 pandemic: results from observational study**

Chala Daba<sup>1\*\*</sup>, Mesfin Gebrehiwot<sup>1\*\*</sup>, Lechisa Asefa<sup>2</sup>, Hailu Lemma<sup>2</sup>, Amanuel Atamo<sup>1</sup>, Edosa Kebede<sup>3</sup>,  
Asha Embrandiri<sup>1</sup>, and Sisay Abebe Debela<sup>4</sup>

\*Correspondence: [chaladaba293@gmail.com](mailto:chaladaba293@gmail.com), [gebrehiwotmesfin@yahoo.com](mailto:gebrehiwotmesfin@yahoo.com)

<sup>1</sup>Department of Environmental Health, College of Medicine and Health Sciences, Wollo University,  
Dessie, Ethiopia, P.O.B.1145

<sup>2</sup>Department of Environmental Health Science, Institute of Health, Bule Hora University, Bule Hora,  
Ethiopia, P.O.B. 144

<sup>3</sup>Departement of Medical Laboratory Science, College of Medicine and Health Sciences, Ambo  
University, Ambo, Ethiopia

<sup>4</sup>Department of Public Health, College of Medicine and Health Sciences, Salale University, Fitcha,  
Ethiopia

*†These authors have contributed equally to this work*

**Appendix 2** Questionnaire used to collect data about occupational safety practices towards COVID-19 and associated factors among Bule Hora University janitors, from November to December, 2021

Questionnaire ID \_\_\_\_\_

Name of the data collector \_\_\_\_\_ Signature \_\_\_\_\_ Date \_\_\_/\_\_\_/2021

Name of the supervisor \_\_\_\_\_ Signature \_\_\_\_\_ Date \_\_\_/\_\_\_/2021

| <b>Part 1: Socio-demographic characteristics of Bule Hora University janitors, from November to December, 2021</b>             |                     |                                                                                             |               |
|--------------------------------------------------------------------------------------------------------------------------------|---------------------|---------------------------------------------------------------------------------------------|---------------|
| <b>S/no</b>                                                                                                                    | <b>Question</b>     | <b>Response</b>                                                                             | <b>Remark</b> |
| 1.                                                                                                                             | Age?                | _____years                                                                                  |               |
| 2.                                                                                                                             | Sex?                | 1=Female<br>2= Male                                                                         |               |
| 3.                                                                                                                             | Educational status? | 1= No formal education<br>2= Primary (up to grade 8)<br>3= Secondary and above (grade 9-12) |               |
| 4.                                                                                                                             | Experience?         | 1= < 3 years<br>2= ≥ 3 years                                                                |               |
| 5.                                                                                                                             | Marital status?     | 1= Single<br>2= married<br>3= Widowed                                                       |               |
| 6.                                                                                                                             | Religion?           | 1= protestant<br>2= orthodox<br>3= Muslim                                                   |               |
| <b>Part 2: Source of information about COVID-19 among of janitors of Bule Hora University, form November to December, 2021</b> |                     |                                                                                             |               |

|                                                                                                                                                                       |                                                             |                                                                          |                                         |
|-----------------------------------------------------------------------------------------------------------------------------------------------------------------------|-------------------------------------------------------------|--------------------------------------------------------------------------|-----------------------------------------|
| 7.                                                                                                                                                                    | Source of information                                       | 1= Social media<br>2= Google<br>3= Government media<br>4= Family/ friend | <b>More than one answer is possible</b> |
| <b>Part 3: Availability of personal protective equipment to prevent COVID-19 transmission among janitors of Bule Hora University, from November to December, 2021</b> |                                                             |                                                                          |                                         |
| 8.                                                                                                                                                                    | Availability of face mask to wear while cleaning            | 0= No<br>1= Yes                                                          | Observe that moments                    |
| 9.                                                                                                                                                                    | Availability of glove while cleaning                        | 0=No<br>1= Yes                                                           | Check by observation                    |
| 10                                                                                                                                                                    | Availability of sanitizers                                  | 0= No<br>1= Yes                                                          | Check by observation                    |
| 11                                                                                                                                                                    | Presence of hand washing facility                           | 0=No<br>1=Yes                                                            | Check by observation                    |
| 12                                                                                                                                                                    | Availability of soap/bleach                                 | 0= No<br>1= Yes                                                          | Check by observation                    |
| 13                                                                                                                                                                    | Availability of dust bin                                    | 0= No<br>1=Yes                                                           | Check by observation                    |
| <b>Part 4: Administrative control characteristics of Bule Hora University Janitors to prevent COVID- 19 transmission, from November to December, 2021</b>             |                                                             |                                                                          |                                         |
| 14                                                                                                                                                                    | Presence of policy and protocol towards COVID-19 prevention | 0= No<br>1=Yes                                                           |                                         |
| 15                                                                                                                                                                    | Training on COVID-19 prevention                             | 0= No<br>1= Yes                                                          |                                         |
